# Supplementary material for: New type of alginate/chitosan microparticle membranes for highly efficient pervaporative dehydration of ethanol
Source: Royal Society of Chemistry journal article supplement (doi:10.1039/c8ra07868h), 2018-01-01
Supplement: c8ra07868h1.pdf [file c8ra07868h1.pdf]

SI Table 1. Size distribution of chitosan particles determined from DLS

| <i>Type of chitosan particles</i> | <i>Particle size, nm</i> |                      |
|-----------------------------------|--------------------------|----------------------|
|                                   | <i>population I</i>      | <i>population II</i> |
| CS                                | 200                      | 800                  |
| CS-GA                             | -                        | 1050                 |
| CS-G                              | 150                      | 700                  |
| CS-P                              | 200                      | 1000                 |
